# Supplementary material
Source: publisher figshare collection journal article supplement (https://acs.figshare.com/ndownloader/files/4615795)

# Ultrasensitive Detection of Cytokines Enabled by Nanoscale ZnO Arrays

*Viktor Adalsteinsson<sup>1</sup>, Omkar Parajuli<sup>1</sup>, Stephen Kepics<sup>1</sup>, Abhishek Gupta<sup>1</sup>, W. Brian Reeves<sup>2</sup>,*

*and Jong-in Hahm<sup>1,\*</sup>*

*1) Department of Chemical Engineering, The Pennsylvania State University, 160 Fenske  
Laboratory, University Park, Pennsylvania 16802.*

*2) Division of Nephrology, The Pennsylvania State University College of Medicine, Milton S.  
Hershey Medical Center, Hershey, Pennsylvania 17033.*

## Supporting Information

**Fluorescence images of IL-18 and TNF $\alpha$  multiplexing assays performed on a 20  $\mu$ m striped ZnO NR platform.** The ZnO NR platform was treated firstly with a mixture of primary IL-18 and TNF $\alpha$  antibodies. After carrying out BSA blocking, a mixture of IL-18 and TNF $\alpha$  with a predetermined concentration ratio was introduced to the assay platform. Then, a secondary, labeled IL-18 and TNF $\alpha$  antibodies were reacted on the platform. Panels shown in A and B were obtained from the same ZnO NR platform area when the concentration ratio between IL-18 and TNF $\alpha$  used in the assay was 20:1 and 2:1, respectively. Top and bottom panels show fluorescence from the IL-18 and TNF $\alpha$  channels, respectively.

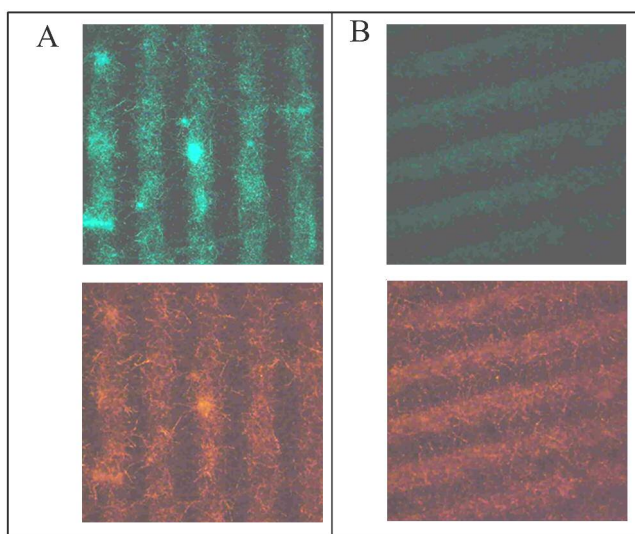

Supplement: Supplementary file 1 [file 4615795]
